# Supplementary material
Source: PubMed Central journal article supplement (PMC6556614)
Supplement: NIHMS1504514-supplement-Sup_1.pdf [file NIHMS1504514-supplement-Sup_1.pdf]

## Appendix A. Stage 2 Analysis Details

Stage two of our analysis on the impact of HMS-detected smoke plumes on air pollution is as follows. We assume the model

$$\begin{aligned}\hat{\beta}|\tilde{\beta} &\sim \mathcal{N}(\tilde{\beta}, \Sigma_1) \\ \tilde{\beta}|\mu &\sim \mathcal{N}(\mu \mathbf{1}_m, \Sigma_2),\end{aligned}$$

where  $m$  is number of stations (from stage one,  $s = 1, \dots, m$ ),  $\hat{\beta}$  is the  $m$ -vector of stage-one plume effect estimates,  $\tilde{\beta}$  is the  $m$ -vector of true plume effects at the  $m$  stations,  $\Sigma_1$  and  $\Sigma_2$  are  $m$ -dimensional spatial covariance matrices and  $\mu$  is the nation-wide average effect of plume episodes on a given pollutant. We aim to estimate and present  $\mu$  for all pollutants and stage-two estimates of  $\tilde{\beta}$ , denoted as  $\hat{\tilde{\beta}}$ .

We consider four special cases of this general two-stage spatial model by changing settings on the spatial covariance matrices. Define  $V$  as the  $m \times m$  diagonal matrix of standard errors of the stage-one plume effect estimates,  $\nu_s$ , and let  $\Omega(\rho_1)$  and  $\Omega(\rho_2)$  be  $m \times m$  exponential correlation matrices with  $(i, j)$  elements  $\exp(-d_{ij}/\rho_1)$  and  $\exp(-d_{ij}/\rho_2)$ , respectively, where  $d_{ij}$  is the distance in kilometers between site  $i$  and site  $j$ , and  $\rho_1$  and  $\rho_2$  are spatial range parameters. We let

$$\begin{aligned}\Sigma_1 &= V [(1 - r_1)I_m + r_1\Omega(\rho_1)] V && \text{(covariance of the stage-one errors)} \\ \Sigma_2 &= \sigma^2 [(1 - r_2)I_m + r_2\Omega(\rho_2)] && \text{(covariance of true } \beta\text{)}\end{aligned}$$

where  $r_1$  and  $r_2$  represent the proportion of variance due to spatial patterns and  $\sigma^2$  is the variance of the true effect. Changing these parameters allows us to investigate if spatially correlated ( $r \neq 0$ ) or independent ( $r = 0$ ) stage-one plume errors and/or constant ( $\sigma^2 = 0$  and thus  $\tilde{\beta}_s = \mu$  for all  $s$ ) or spatially varying ( $\sigma^2 > 0$  and thus  $\tilde{\beta}_s \neq \mu$  for all  $s$ ) true plume effects are the best fit for a given pollutant. Appendix Table 1 summarizes these four models.

Table 1: Description of the four models fit for each pollutant.

| Model | Settings                                  | Spatial Errors | $\tilde{\beta}_j \neq \mu, \forall j$ |
|-------|-------------------------------------------|----------------|---------------------------------------|
| 1     | $\sigma^2 = 0, r_1 = 0$                   | no             | no                                    |
| 2     | $\sigma^2 = 0, r_1 \neq 0$                | yes            | no                                    |
| 3     | $\sigma^2 \neq 0, r_1 = r_2 = 0$          | no             | yes                                   |
| 4     | $\sigma^2 \neq 0, r_1 \neq 0, r_2 \neq 0$ | yes            | yes                                   |

For each pollutant, we fit the four models in Appendix Table 1 and determine best fit with BIC (see results in Table 2 in the main text).

To estimate the nation-wide average plume effect,  $\mu$ , for each pollutant, we computed the GLS estimate,  $\hat{\mu}$ , and the variance of  $\hat{\mu}$  in R. The derivation for the GLS is as follows:

$$\begin{aligned}\hat{\beta} &= \tilde{\beta} + e_1, \quad e_1 \sim N(0, \Sigma_1) \\ \tilde{\beta} &= \mu \mathbf{1}_m + e_2, \quad e_2 \sim N(0, \Sigma_2)\end{aligned}$$

$$\begin{aligned}\implies \hat{\beta} &= \mu \mathbf{1}_m + e^*, \quad e^* \sim N(0, \Sigma_1 + \Sigma_2) \\ \implies \hat{\mu} &= \left( \mathbf{1}_m^T \left( \hat{\Sigma}_1 + \hat{\Sigma}_2 \right)^{-1} \mathbf{1}_m \right)^{-1} \mathbf{1}_m^T \left( \hat{\Sigma}_1 + \hat{\Sigma}_2 \right)^{-1} \hat{\beta} \\ \implies \text{Var}(\hat{\mu}) &= \left( \mathbf{1}_m^T \left( \hat{\Sigma}_1 + \hat{\Sigma}_2 \right)^{-1} \mathbf{1}_m \right)^{-1}\end{aligned}$$

where  $\hat{\Sigma}_1$  and  $\hat{\Sigma}_2$  are functions of the maximum likelihood estimates of the spatial covariance parameters  $\phi$  calculated using the R package, `optim`. To estimate the stage-two estimates of the true plume effect,  $\tilde{\beta}$ , we compute:

$$\hat{\tilde{\beta}} = \left( \hat{\Sigma}_1^{-1} + \hat{\Sigma}_2^{-1} \right)^{-1} \left( \hat{\Sigma}_1^{-1} \hat{\beta} + \hat{\Sigma}_2^{-1} \hat{\mu} \mathbf{1}_m \right).$$
